# Supplementary material for: Definitions and Prevalence of Multimorbidity in Large Database Studies: A Scoping Review
Source: PubMed Central journal article supplement (PMC7916224; doi:10.3390/ijerph18041673), 2021-02-09
Supplement: ijerph-18-01673-s001.pdf [file ijerph-18-01673-s001.pdf]

## Supplementary Materials

### Supplementary Table S1: Searching methodology

Date of search: 8/3/2020

#### Supplemental table S1a: Ovid MEDLINE (R): 1946 to 2020 March 08

| #  | Searches                                                                                                                                                      | Results |
|----|---------------------------------------------------------------------------------------------------------------------------------------------------------------|---------|
| 1  | multimorbidity/ or multiple chronic conditions/                                                                                                               | 1081    |
| 2  | (multimorbid* or multi-morbid* or comorbid* or co-morbid*).ab,ti,kw.                                                                                          | 143825  |
| 3  | ((multiple or coexist* or co-exist* or concurrent* or simultaneous*) adj2 (disease* or illness* or diagnos* or condition* or morbid* or disorder*)).ab,ti,kw. | 43585   |
| 4  | 1 or 2 or 3                                                                                                                                                   | 183995  |
| 5  | Electronic health records/                                                                                                                                    | 18600   |
| 6  | ((Electronic or computer* or administrative) adj2 (record* or data*)).ab,ti,kw.                                                                               | 76483   |
| 7  | (Large database* or database*).ab,ti,kw.                                                                                                                      | 341698  |
| 8  | 5 or 6 or 7                                                                                                                                                   | 390501  |
| 9  | Prevalence/                                                                                                                                                   | 283624  |
| 10 | (Prevalen* or epidemio*).ab,ti,kw.                                                                                                                            | 913241  |
| 11 | 9 or 10                                                                                                                                                       | 980075  |
| 12 | 4 and 8 and 11                                                                                                                                                | 4040    |
| 13 | Limit 12 to (English language and humans)                                                                                                                     | 3905    |

#### Supplemental table S1b: Embase: 1974 to 2020 March 08

| #  | Searches                                                                                                                                                      | Results |
|----|---------------------------------------------------------------------------------------------------------------------------------------------------------------|---------|
| 1  | exp Multiple chronic conditions/                                                                                                                              | 2801    |
| 2  | (multimorbid* or multi-morbid* or comorbid* or co-morbid*).ab,ti,kw.                                                                                          | 319120  |
| 3  | ((multiple or coexist* or co-exist* or concurrent* or simultaneous*) adj2 (disease* or illness* or diagnos* or condition* or morbid* or disorder*)).ab,ti,kw. | 77586   |
| 4  | 1 or 2 or 3                                                                                                                                                   | 388894  |
| 5  | Electronic health record/ or electronic medical record/                                                                                                       | 68868   |
| 6  | (Electronic or computer* or administrative*) adj2 (record* or data*).ab,ti,kw.                                                                                | 153076  |
| 7  | (Large database* or database*).ab,ti,kw.                                                                                                                      | 635643  |
| 8  | 5 or 6 or 7                                                                                                                                                   | 741513  |
| 9  | Prevalence/                                                                                                                                                   | 694889  |
| 10 | (Prevalen* or epidemio*).ab,ti,kw.                                                                                                                            | 1465157 |
| 11 | 9 or 10                                                                                                                                                       | 1596491 |
| 12 | 4 and 8 and 11                                                                                                                                                | 10464   |
| 13 | limit 12 to (English language and humans)                                                                                                                     | 9815    |
| 14 | Limit 13 to (article or article in press)                                                                                                                     | 4436    |

#### Supplemental table S1c: CINAHL: 1984 to 2020 March 08

| #  | Searches                                                                                                                                        | Results |
|----|-------------------------------------------------------------------------------------------------------------------------------------------------|---------|
| 1  | (MH "comorbidity")                                                                                                                              | 56629   |
| 2  | multimorbid* or multi-morbid* or comorbid* or co-morbid*                                                                                        | 97530   |
| 3  | (multiple or coexist* or co-exist* or concurrent* or simultaneous*) N2 (disease* or illness* or diagnos* or condition* or morbid* or disorder*) | 18589   |
| 4  | 1 or 2 or 3                                                                                                                                     | 113365  |
| 5  | (MH "electronic health records")                                                                                                                | 22313   |
| 6  | (Electronic or computer* or administrative) N2 (record* or data*)                                                                               | 138566  |
| 7  | Large database* or database*                                                                                                                    | 168616  |
| 8  | 5 or 6 or 7                                                                                                                                     | 272365  |
| 9  | (MH "prevalence")                                                                                                                               | 85505   |
| 10 | Prevalen* or epidemio*                                                                                                                          | 553492  |
| 11 | 9 or 10                                                                                                                                         | 553492  |
| 12 | 4 and 8 and 11                                                                                                                                  | 5300    |
| 13 | Limit 13 to (English language and humans)                                                                                                       | 4160    |



|                                        |                                |                                          |                             |                                                  |                                                                                |                                         |                                   |                                  |
|----------------------------------------|--------------------------------|------------------------------------------|-----------------------------|--------------------------------------------------|--------------------------------------------------------------------------------|-----------------------------------------|-----------------------------------|----------------------------------|
|                                        |                                |                                          | ry diseases                 |                                                  |                                                                                |                                         |                                   | extremity amputation             |
| Chronic coronary syndrome              | Hyperthyroidism/thyrotoxicosis | Gastroesophageal reflux                  | Pelvic inflammatory disease | Depression                                       | Joint disease                                                                  | Malignancy NOS                          | Insomnia                          | Mental retardation               |
| Chronic heart disease, others          | Hypothyroid                    | Haemorrhoids                             | Prostate disease            | Depression and mood diseases                     | Low back pain                                                                  | Malignancy other than prostate cancer   | Ischemic stroke                   | Minor lower extremity amputation |
| Congestive heart failure               | Hypothyroidism                 | Inflammatory bowel disease               | Prostatic disorders         | Depression or anxiety                            | Musculoskeletal disease, other                                                 | Malignant neoplasm bladder              | Migraine                          |                                  |
| Coronary artery bypass graft (CABG)    | Hypothyroidism/edema           | Irritable bowel syndrome                 | Prostatic hypertrophy       | Depressive disorder                              | Neck pain                                                                      | Malignant neoplasm blood other          | Migraine and facial pain syndrome |                                  |
| Coronary disease                       | Hypothyroidism                 | Oesophagus, stomach and duodenum disease | Renal disease               | Dysthymia                                        | Neck syndrome                                                                  | Malignant neoplasm breast female        | Migraine or frequent headaches    |                                  |
| Coronary heart disease                 | Lipid disorder                 | Other digestive disease                  | Renal failure               | Generalised anxiety disease                      | Osteoarthritis                                                                 | Malignant neoplasm bronchus, lung       | Multiple sclerosis                |                                  |
| Heart disease                          | Lipid disorders                | Peptic ulcer                             | Urinary disease, other      | Long term use of antidepressants                 | Osteoarthritis and arthritis not otherwise specified (herein called arthritis) | Malignant neoplasm cervix               | Nervous system disorders          |                                  |
| Heart disease, other                   | Obesity                        | Peptic ulcer disease                     | Urinary incontinence        | Major depression                                 | Osteoarthritis and degenerative joint disease                                  | Malignant neoplasm colon/rectum         | Neuraesthesia, surmenage          |                                  |
| Heart failure                          | Other metabolic disease        | Peptic ulcer other                       | Urologic disease            | Mental disorders                                 | Osteoarthritis of hip                                                          | Malignant neoplasm genital female other | Neurological disease, other       |                                  |
| Heart valve disease NOS                | Overweight                     | Peptide ulcer                            |                             | Mood disorder                                    | Osteoarthritis of knee                                                         | Malignant neoplasm kidney               | Neurological infection, other     |                                  |
| Heart/arterial murmur NOS              | Thyroid disease                |                                          |                             | Neurotic, stress-related and somatoform diseases | Osteoarthritis or rheumatism                                                   | Malignant neoplasm male genital, other  | Other neurological diseases       |                                  |
| Hypertension                           | Thyroid disorders              |                                          |                             | Organic psychosis, other                         | Osteoarthritis, other                                                          | Malignant neoplasm nervous system       | Other neurological disorders      |                                  |
| Hypertension, complicated              | Thyroidal disease              |                                          |                             | Other mental disorders                           | Osteoarthritis/spine disorder                                                  | Malignant neoplasm of skin              | Parkinson and parkinsonism        |                                  |
| Hypertension, uncomplicated            |                                |                                          |                             | Other psych and behavioural diseases             | Osteoporosis                                                                   | Malignant neoplasm pancreas             | Parkinsonism                      |                                  |
| Ischaemic heart disease with angina    |                                |                                          |                             | Other psychoactive substance misuse              | Painful condition                                                              | Malignant neoplasm prostate             | Parkinson's disease               |                                  |
| Ischaemic heart disease without angina |                                |                                          |                             | Personality disorder                             | Paralysis                                                                      | Malignant neoplasm related to fertility | Parkinson's disease or syndrome   |                                  |
| Ischemic heart disease                 |                                |                                          |                             | Personality disorders                            | Paralysis or muscular dystrophy                                                | Malignant neoplasm respiratory, other   | Peripheral neuritis/neuropathy    |                                  |

|                                          |                                                        |                   |                                      |                                      |
|------------------------------------------|--------------------------------------------------------|-------------------|--------------------------------------|--------------------------------------|
| Myocardial infarction                    | Phobia/compulsive disorder                             | Shoulder syndrome | Malignant neoplasm stomach           | Peripheral neuropathy                |
| Other cardiovascular disease             | Post-traumatic stress disorder                         | Spine fracture    | Malignant neoplasm thyroid           | Peripheral neuropathy, neuritis      |
| Paroxysmal tachycardia                   | Psychological disorders, other                         | Tennis elbow      | Malignant neoplasm, musculoskeletal  | Sleep disorder                       |
| Percutaneous coronary intervention (PCI) | Psychosis NOS/other                                    |                   | Malignant neoplasm, urinary, other   | Stroke                               |
| Postural hypotension                     | Schizophrenia                                          |                   | Malignant tumours                    | Stroke and transient ischemic attack |
| Pulmonary heart disease                  | Schizophrenia (and related non-organic psychosis)      |                   | Metastatic carcinoma                 | Stroke/cerebrovascular accident      |
| Rheumatic fever/heart disease            | Schizophrenia and delusional disease                   |                   | Metastatic solid tumour              | Transient cerebral ischaemia         |
| Secondary hypertension                   | Schizophrenia and psychosis                            |                   | Neoplasm endocrine other/uncertain   | Trigeminal neuralgia                 |
|                                          | Schizophrenia, affective psychosis or bipolar disorder |                   | Neoplasm nervous system, unspecified |                                      |
|                                          | Somatisation disorder                                  |                   | Neoplasm of ear                      |                                      |
|                                          | Substance use disorders                                |                   | Neoplasm of eye/adnexa               |                                      |
|                                          |                                                        |                   | Neoplasm, cardiovascular             |                                      |
|                                          |                                                        |                   | Prostate cancer                      |                                      |
